# Supplementary material
Source: PubMed Central journal article supplement (PMC3235792)
Supplement: NIHMS342546-supplement-ESI.pdf [file NIHMS342546-supplement-ESI.pdf]

## Supramolecular hydrogelators of N-terminated dipeptides selectively inhibit HeLa cells

Yi Kuang, Yuan Gao, Bing Xu\*

### Materials

All the chemicals used in this work were purchased from Aldrich or Fluka, and used without further purification. Nanopure water was used for all the tests of hydrogelation.

### Characterization and instrumentation

NMR experiments were performed on a 400 MHz Varian Unity Inova 400 using DMSO- $d_6$  as the solvent. TEM images on Morgagni 268 transmission electron microscope. Rheological studies were measured on TA ARES G2 rheometer. MTT cytotoxicity studies were measured on .

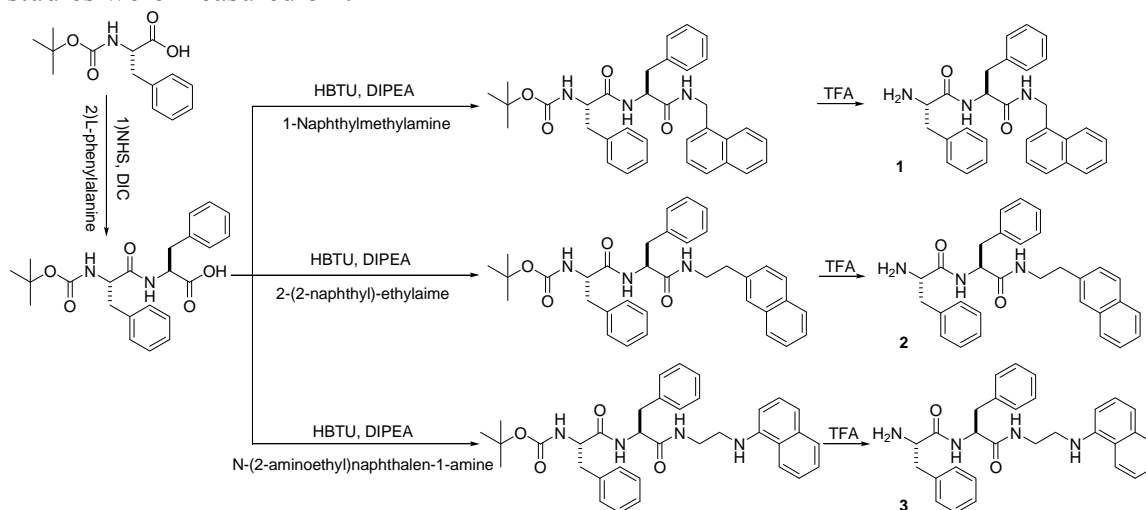

**Scheme S1** Synthetic scheme of the N-terminated hydrogelators.

Synthesis procedure: 1 mmol Boc-Phe, 1 mmol NHS and 1 mmol DIC were dissolved in 10 mL CHCl<sub>3</sub> and stirred for 2h. After the removal of CHCl<sub>3</sub> by rotary evaporator, the remaining white powder was dissolved in 10 mL acetone then added dropwise into 5 mL water containing 1 mmol H-Phe-OH (pH 8~9). After stirring overnight, acetone was removed by a rotary evaporator, and Boc-Phe-Phe was precipitated by acidification of the water solution. After Boc-Phe-Phe was purified by flash chromatography, 1 mmol Boc-Phe-Phe, 2 mmol HBTU, 2 mmol DIPEA and 1 mmol 1-naphthylmethylamine (for **1**), or 1 mmol 2-(2-naphthyl)-ethylamine (for **2**) or 1 mmol N-(2-aminoethyl)naphthalene-1-amine (for **3**) were dissolved in 10 mL DMF and stirred for 2h. We used air-blowing to remove most of the DMF, then 20 mL water was added into the sticky mixture to precipitate the Boc-protected product. Boc-group was removed by stirring in 5 mL TFA, and the desired product was precipitated by ample amount of ether and further purified by HPLC.

$^1\text{H}$  NMR (400 MHz, DMSO-*d*<sub>6</sub>) of **1**:  $\delta$  8.91 (d,  $J=4.0$  Hz, 1H), 8.73 (t,  $J=4.0$  Hz, 1H), 8.05 (m, 2H), 7.95 (m, 1H), 7.85 (d,  $J=4.0$  Hz, 1H), 7.53 (m, 2H), 7.40 (m, 1H), 7.26 (m, 10H), 4.73 (m, 2H), 4.67 (m, 1H), 4.02 (m, 1H), 3.01 (m, 4H), 1.09 (m, 2H).

$^1\text{H}$  NMR (400 MHz, DMSO-*d*<sub>6</sub>) of **2**:  $\delta$  8.78 (d,  $J=4.0$  Hz, 1H), 8.27 (m, 1H), 7.89 (m, 4H), 7.68 (m, 1H), 7.45 (m, 2H), 7.26 (m, 10H), 4.52 (m, 1H), 4.00 (m, 1H), 3.09 (m, 2H), 2.87 (m, 4H), 2.63 (m, 2H) 1.09 (m, 2H).

$^1\text{H}$  NMR (400 MHz, DMSO-*d*<sub>6</sub>) of **3**:  $\delta$  8.92 (d,  $J=4.0$  Hz, 1H), 8.42 (m, 1H), 8.09 (m, 4H), 7.76 (m, 1H), 7.39 (m, 2H), 7.22 (m, 10H), 4.54 (m, 1H), 4.04 (m, 1H), 3.37 (m, 4H), 3.04 (m, 4H), 1.09 (m, 2H).

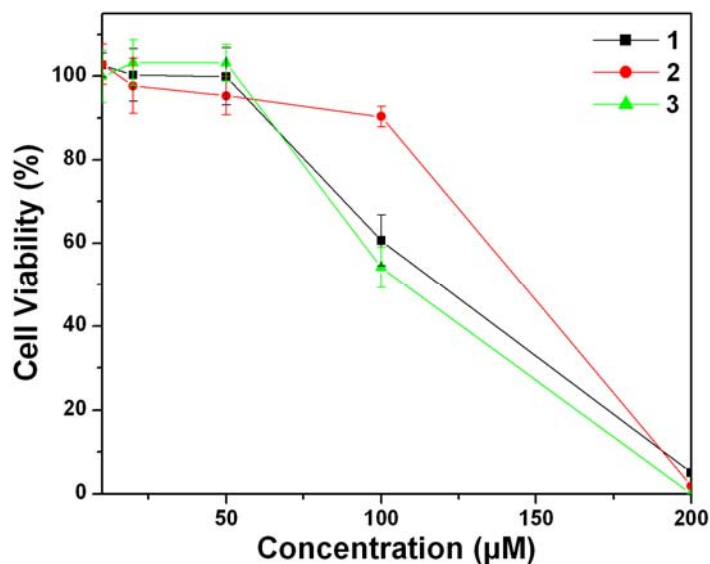

**Figure S1.** 48h cytotoxicity of N-terminated hydrogelators on T98G cells.
